# Supplementary material for: Mitochondrial Control Region Variants Related to Breast Cancer
Source: Preprints.org preprint supplement (doi:10.20944/preprints202208.0337.v1), 2022-08-18
Supplement: Supplementary file 2 [file supplementary]

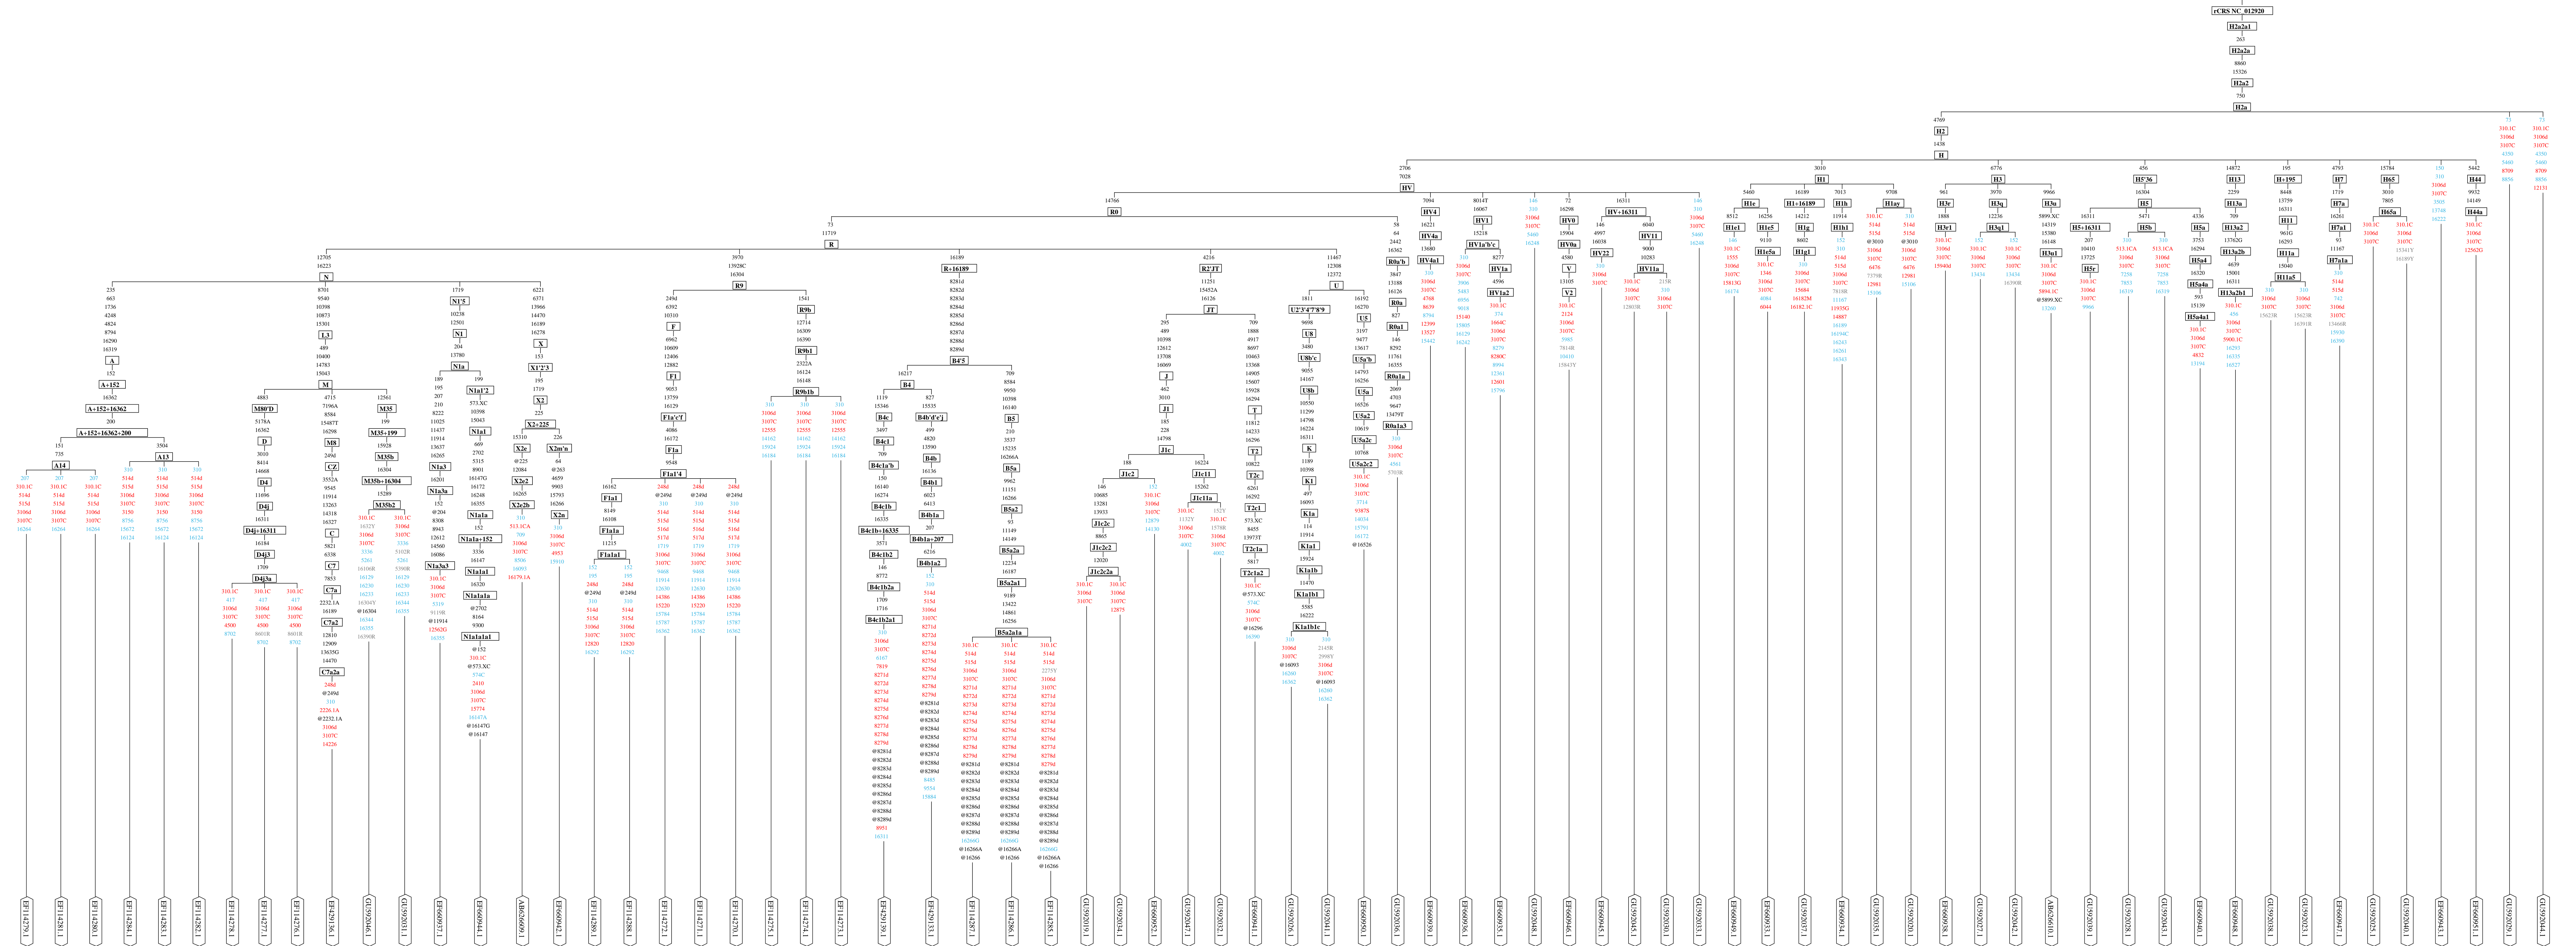

**KEY**  
Local private mutation  
Global private mutation  
= assumed back mutation  
or missing mutation  
Heteroplasmic mutation
