# Supplementary material for: Mitochondrial Control Region Variants Related to Breast Cancer
Source: Preprints.org preprint supplement (doi:10.20944/preprints202208.0337.v1), 2022-08-18
Supplement: Supplementary file 2 [file Table S2 Comparative macrohaplogroups distribution.docx]

| **Complete mtDNA sequences**  **(All mitochondrial chromosome)** | | | **Partial mtDNA sequences**  **(Control region and hypervariable regions)** | | | |
| --- | --- | --- | --- | --- | --- | --- |
| **Macrohaplogroup** | **Number of individual sequences** | **%** | **Number of individual sequences** | | **%** | |
|  |  |  |  |  | |
| **A** | 2 | 2.4 | - | - | |
| **B** | 3 | 3.5 | 3 | 7.9 | |
| **C** | 1 | 1.2 | 1 | 2.6 | |
| **D** | 4 | 4.7 | 3 | 7.9 | |
| **E** | 1 | 1.2 | 1 | 2.6 | |
| **F** | 1 | 1.2 | - | - | |
| **H** | 44 | 50.6 | 11 | 29.0 | |
| **J** | 4 | 4.7 | - | - | |
| **K** | 1 | 1.2 | - | - | |
| **M** | 2 | 2.4 | 1 | 2.6 | |
| **N** | 5 | 6.0 | 1 | 2.6 | |
| **R** | 3 | 3.5 | 1 | 2.6 | |
| **T** | 3 | 3.5 | 3 | 7.9 | |
| **U** | 6 | 7.0 | 11 | 29.0 | |
| **V** | 2 | 2.4 | - | - | |
| **X** | 2 | 2.4 | - | - | |
| **Z** | 2 | 2.4 | 2 | 5.3 | |
|  |  |  |  |  | |
|  | 86 | 100 | 38 | 100 | |

Table S2. Comparative summary of macrohaplogroups distribution obtained from complete and partial mitochondrial sequences from patients diagnosed with breast cancer. More than half of the complete sequences and more than a quarter of partial samples studied belong to European origin. For detailed information about haplogroups, haplotypes and subclades assigned, consult *Supplemental Table S2*.
