# Supplementary material for: Mitochondrial Control Region Variants Related to Breast Cancer
Source: Preprints.org preprint supplement (doi:10.20944/preprints202208.0337.v1), 2022-08-18
Supplement: Supplementary file 3 [file Table S3_Ghost polymorphisms.docx]

| **Position** | **Amount** | **Soares Score** |
| --- | --- | --- |
|  |  |  |
| 3106d | 47 | 0 |
| 3107C | 47 | 0 |
| 310.1C | 39 | 0 |
| 514d | 9 | 0 |
| 515d | 9 | 0 |
| 398d | 8 | 0 |
| 248d | 6 | 0 |
| 430A | 4 | 0 |
| 49T | 4 | 0 |
| 16011d | 4 | 0 |
| 8279d | 3 | 0 |
| 8272d | 3 | 0 |
| 8271d | 3 | 0 |
| 8274d | 3 | 0 |
| 8273d | 3 | 0 |
| 8276d | 3 | 0 |
| 8275d | 3 | 0 |
| 8278d | 3 | 0 |
| 8277d | 3 | 0 |
| 16184A | 3 | 1 |
| 12562G | 2 | 0 |
| 16032.1G | 2 | 0 |
| 16258d | 2 | 0 |
| 16189d | 2 | 0 |
| 16422A | 2 | 0 |
| 397T | 2 | 0 |
| 37G | 2 | 0 |
| 16012d | 2 | 0 |
| 574C | 2 | 2 |
| 16353T | 2 | 1 |
| 16390R | 2 | 0 |
| 513.1CA | 2 | 0 |
| 284.1C | 2 | 0 |
| 285.1A | 2 | 0 |
|  |  |  |

Table S3. Comparative summary of the distribution of possible phantom polymorphisms in 47 complete mtDNA sequences with breast cancer diagnosis. For more detailed information like *Genbank* ID number and haplogroups assigned, consult *Supplemental Table S4*.
