# Supplementary material for: Mitochondrial Control Region Variants Related to Breast Cancer
Source: Preprints.org preprint supplement (doi:10.20944/preprints202208.0337.v1), 2022-08-18
Supplement: Supplementary file 4 [file Table S4 Summary of the heteroplasmic in mtDNA.docx]

**Complete sequences heteroplasmy**

| **Position** | ***Genbank* ID sequence number** | **Heteroplasmic polymorphism** |
| --- | --- | --- |
|
| 1632 | GU592046.1 | Y |
| 2145 | GU592041.1 | R |
| 2275 | EF114285.1 | Y |
| 2998 | GU592041.1 | Y |
| 5703 | GU592036.1 | R |
| 7379 | GU592035.1 | R |
| 7814 | EF660946.1 | R |
| 7818 | EF660934.1 | R |
| 8601 | EF114276.1 | R |
| 9119 | EF660937.1 | R |
| 9387 | EF660950.1 | R |
| 12803 | GU592045.1 | S |
| 13466 | EF660947.1 | R |
| 15341 | GU592040.1 | Y |
| 15623 | GU592038.1 | R |
| 15843 | EF660946.1 | Y |
| 16106 | EF660946.1 | M |
| 16182 | GU592037.1 | M |
| 16189 | GU592040.1 | M |
| 16189 | GU592046.1 | M |
| 16390 | GU592042.1 | R |

**Control sequence heteroplasmy**

| **Position** | ***Genbank* ID sequence number** | **Heteroplasmic polymorphism** |
| --- | --- | --- |
|
| 152 | GU592032.1 | Y |
| 215 | GU592030.1 | R |
| 8601 | GU592047.1 | R |
| 5192 | GU592031.1 | R |
| 5390 | GU592031.1 | R |
| 15078 | GU592032.1 | R |
| 15623 | GU592023.1 | R |
| 16391 | GU592023.1 | R |
|  |  |  |

Table S6. Summary of the heteroplasmic in mtDNA sequences by position in cases diagnosed with breast cancer. The sequence GU592023.1 was identified as a heteroplasmic position in 16401, while GU592042.1and GU592046.1 was identified in position 16400. The significance of heteroplasmic polymorphism is code following IUPAC single letter codes: symbol *R* name *Purine* and remarks *A* or *G*; symbol *Y* Name *Pyrimidine* and remarks *C* or *T*; symbol *S* name *Strong* and remarks *C* or *G*; and symbol *M* are used for *A* or *C*.
