# Supplementary material for: Mitochondrial Control Region Variants Related to Breast Cancer
Source: Preprints.org preprint supplement (doi:10.20944/preprints202208.0337.v1), 2022-08-18
Supplement: Supplementary file 5 [file Table S5 Summary of the heteroplasmic polymorphisms detected.docx]

**Breast cancer mitocondrial heteroplasmy**

| ***Genebank* ID**  **number sequence** | **Position in mtDNA sequence** | **Type of Heteroplasmy** | **Haplogroup assigned** |
| --- | --- | --- | --- |
| GU592046.1 | 1632 | Y | M35b (M35b2) |
| 16189 | M |
| GU592041.1 | 2145 | R | K1a (K1a1b1c) |
| 2998 | Y |
| EF660946.1 | 7814 | R | V2 (V2) |
| 15843 | Y |
| 16106 | M |
| GU592040.1 | 15341 | Y | H65a (H65a) |
| 16189 | M |
| EF114285.1 | 2275 | Y | B5a (B5a2a1a) |
| GU592036.1 | 5703 | R | R0a (R0a1a3) |
| GU592035.1 | 7379 | R | H1a (H1ay) |
| EF660934.1 | 7818 | R | H1h (H1h1) |
| EF114276.1 | 8601 | R | D4j (D4j3a) |
| EF660937.1 | 9119 | R | N1a (N1a3a3) |
| EF660950.1 | 9387 | R | U5a (U5a2c2) |
| GU592045.1 | 12803 | S | HV11a (HV11a) |
| EF660947.1 | 13466 | R | H7a (H7a1a) |
| GU592038.1 | 15623 | R | H11a (H11a5) |
| GU592037.1 | 16182 | M | H1g (H1g1) |
| GU592042.1 | 16390 | R | H3q (H3q1) |
| GU592047.1 | 8601 | R | J1c (J1c11a) |

**Control sequences**

| ***Genebank* ID**  **number sequence** | **Position in mtDNA sequence** | **Type of Heteroplasmy** | **Haplogroup assigned** | **Source** |
| --- | --- | --- | --- | --- |
| GU592031.1 | 5192 | R | M35b (M35b2) | LCM normal cells control sample of  GU592046.1 |
| 5390 | R |
| GU592023.1 | 15623 | R | H11a (H11a5) | LCM normal cells control sample of  GU592038.1 |
| 16391 | R |
| GU592032.1 | 152 | Y | J1c (J1c11a) | LCM normal cells control sample of  GU592047.1 |
| 15078 | R |
| GU592030.1 | 215 | R | HV11 (HV11a) | LCM normal cells control sample of  GU592045.1 |

Table S7. Summary of the heteroplasmic polymorphisms detected by sequence, not related with haplotyping in mtDNA sequences of cases diagnosed with breast cancer and controls. The meaning of heteroplasmic polymorphism are code following IUPAC single letter codes: symbol *R* name *Purine* and remarks *A* or *G*; symbol *Y* Name *Pyrimidine* and remarks *C* or *T*; symbol *S* name *Strong* and remarks *C* or *G*; and symbol *M* are used for *A* or *C*. LCM: laser capture microdissection.
