# Supplementary figures and images for: Mitochondrial Control Region Variants Related to Breast Cancer
Source: Preprints.org preprint supplement (doi:10.20944/preprints202208.0337.v1), 2022-08-18

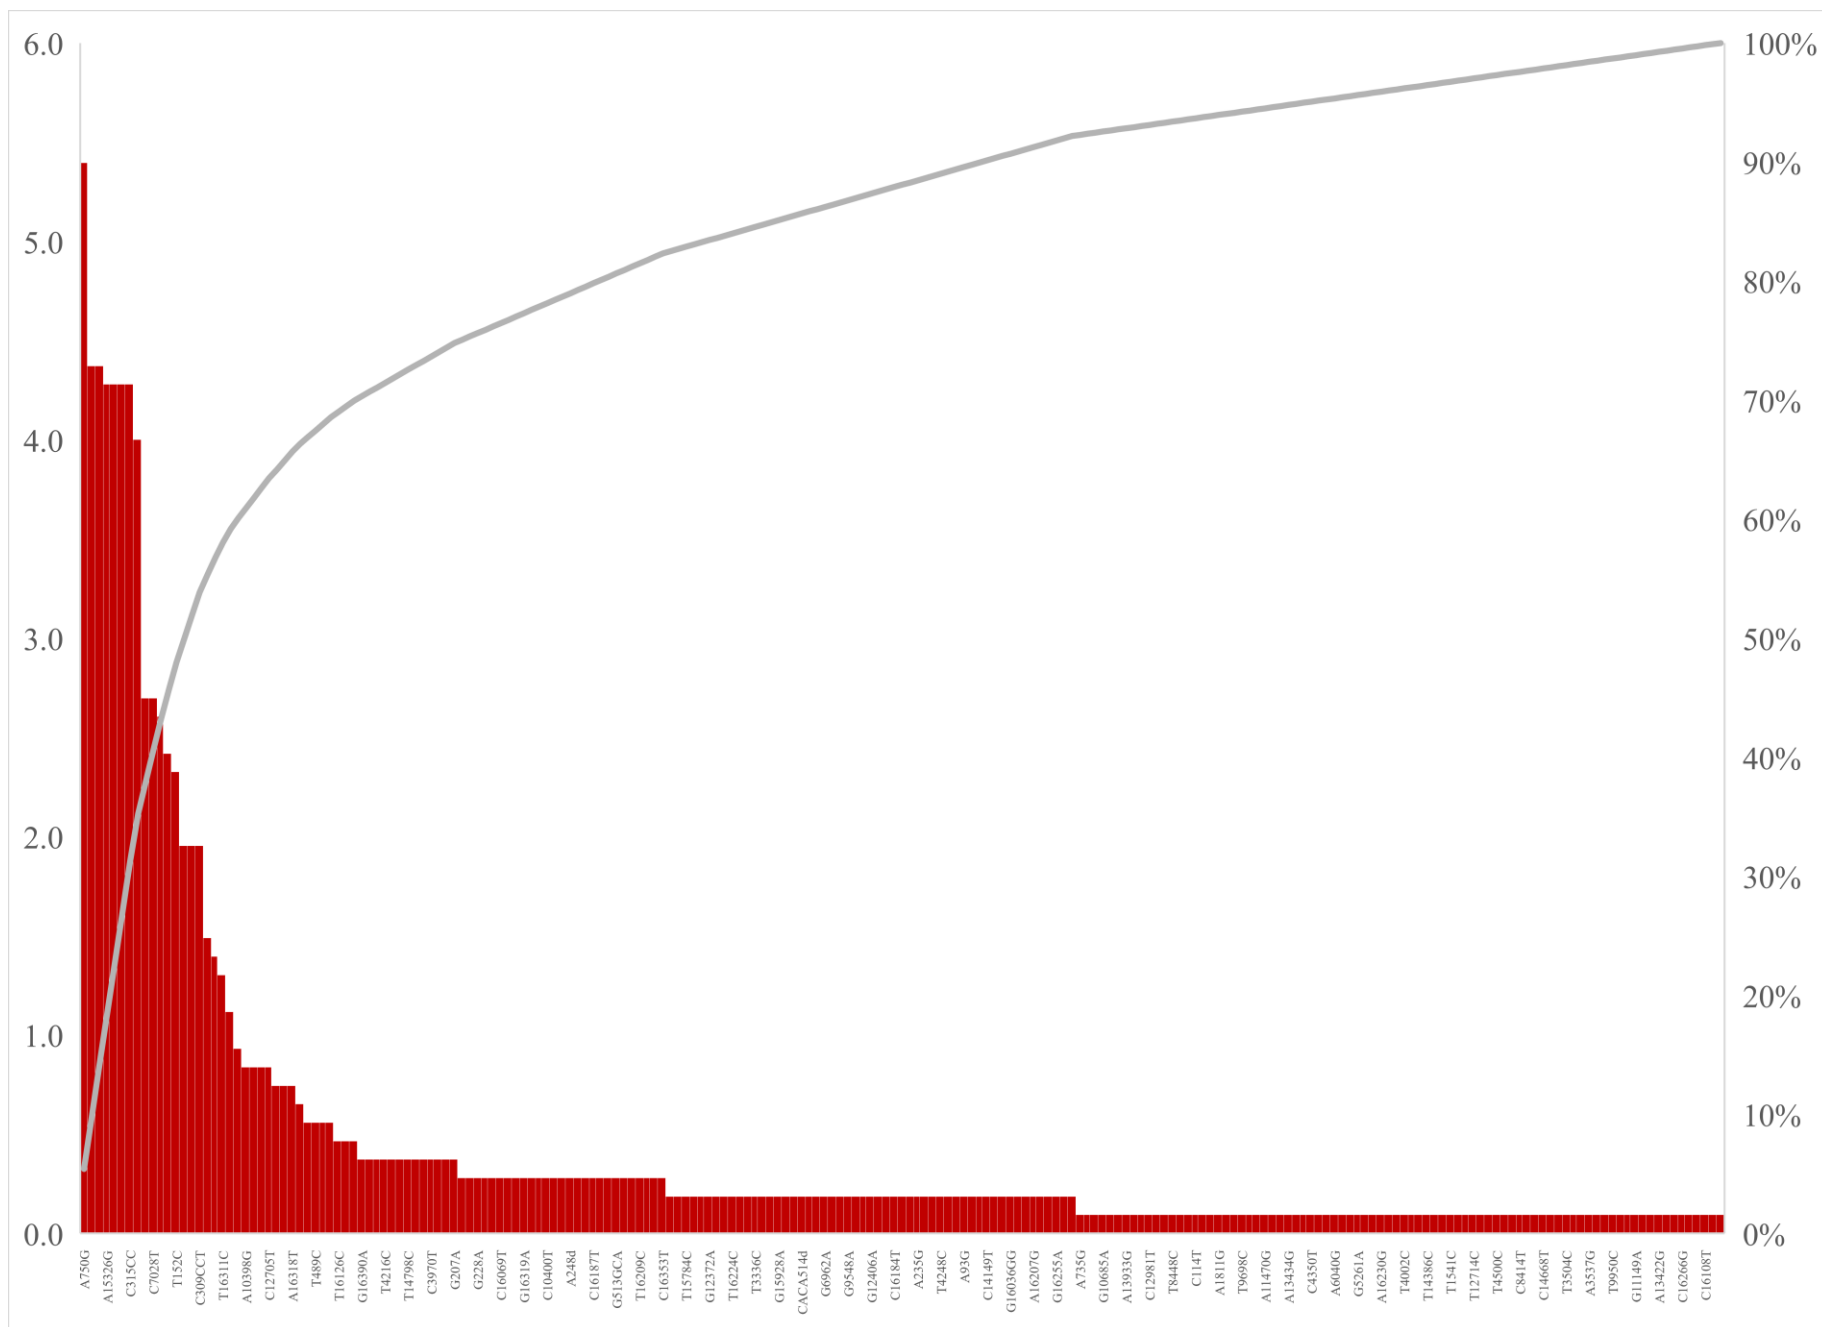

Supplement: Supplementary file 1 [file supplementary]

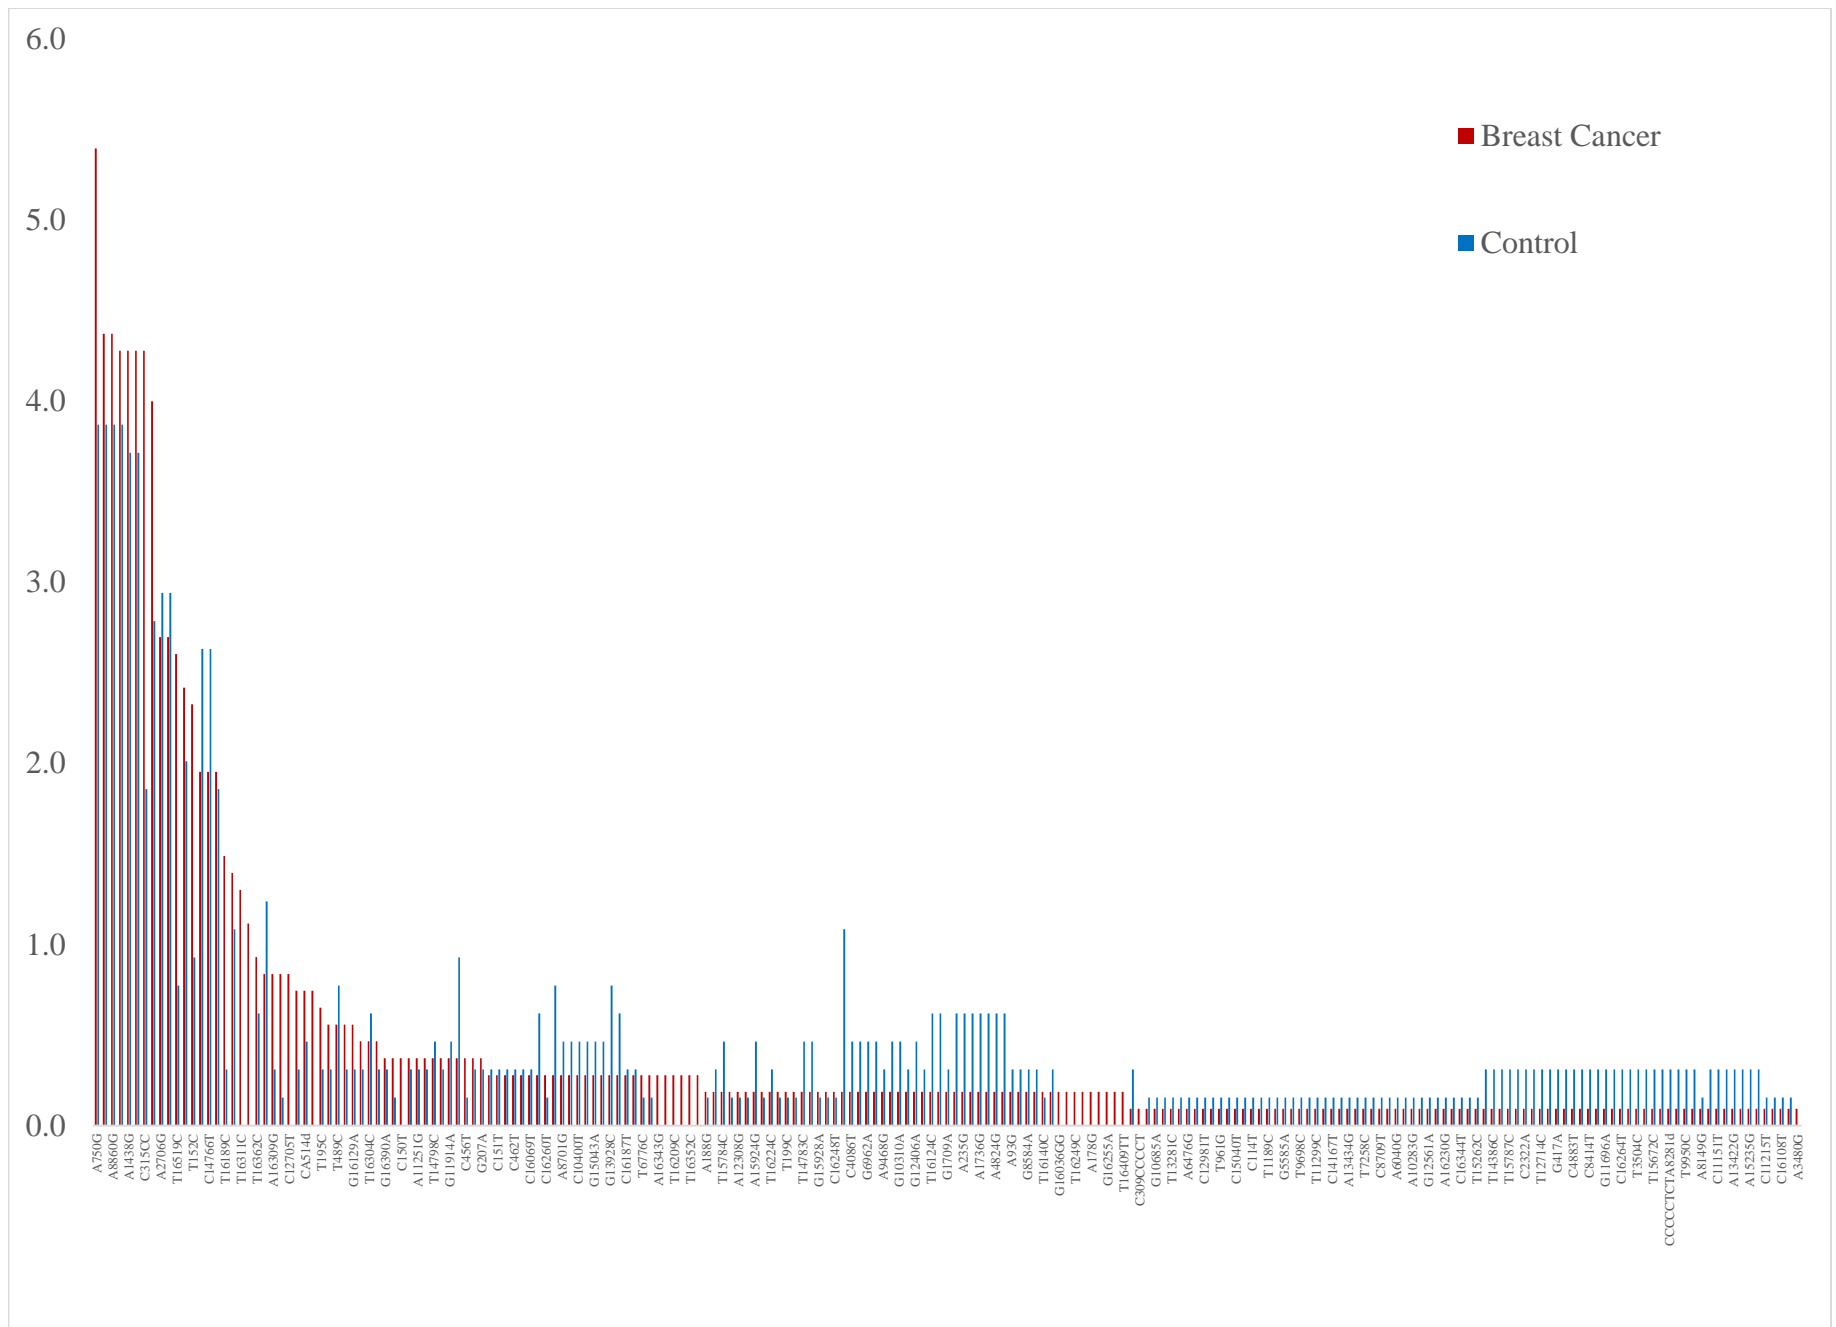

Supplement: Supplementary file 3 [file supplementary]

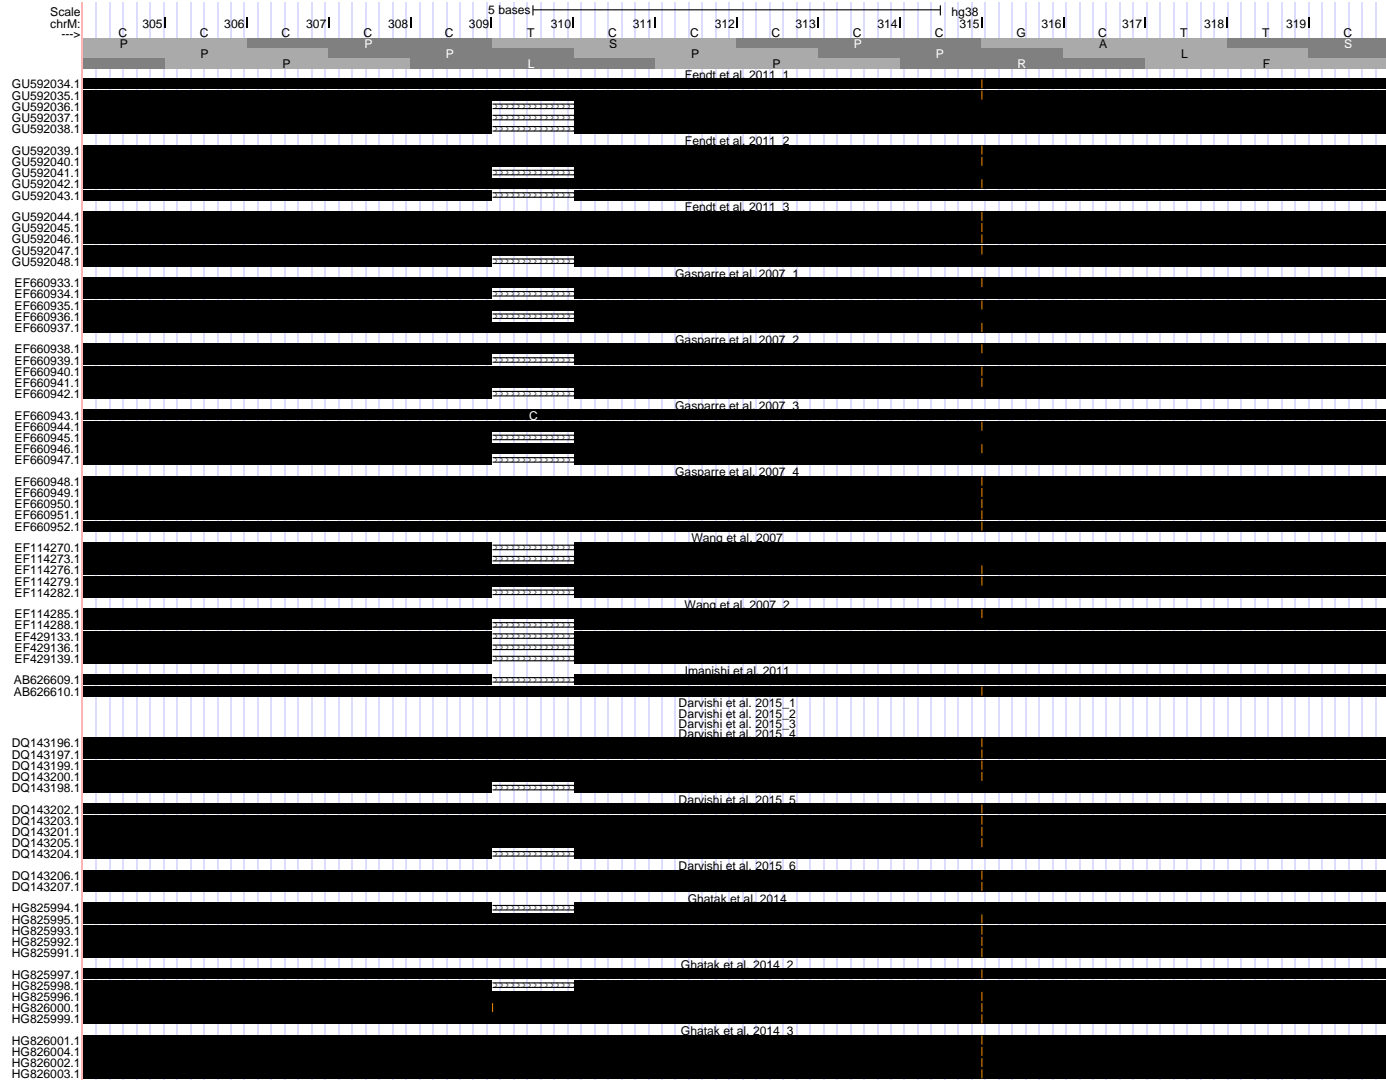

Supplement: Supplementary file 4 [file supplementary]

■ Breast Cancer ■ Control

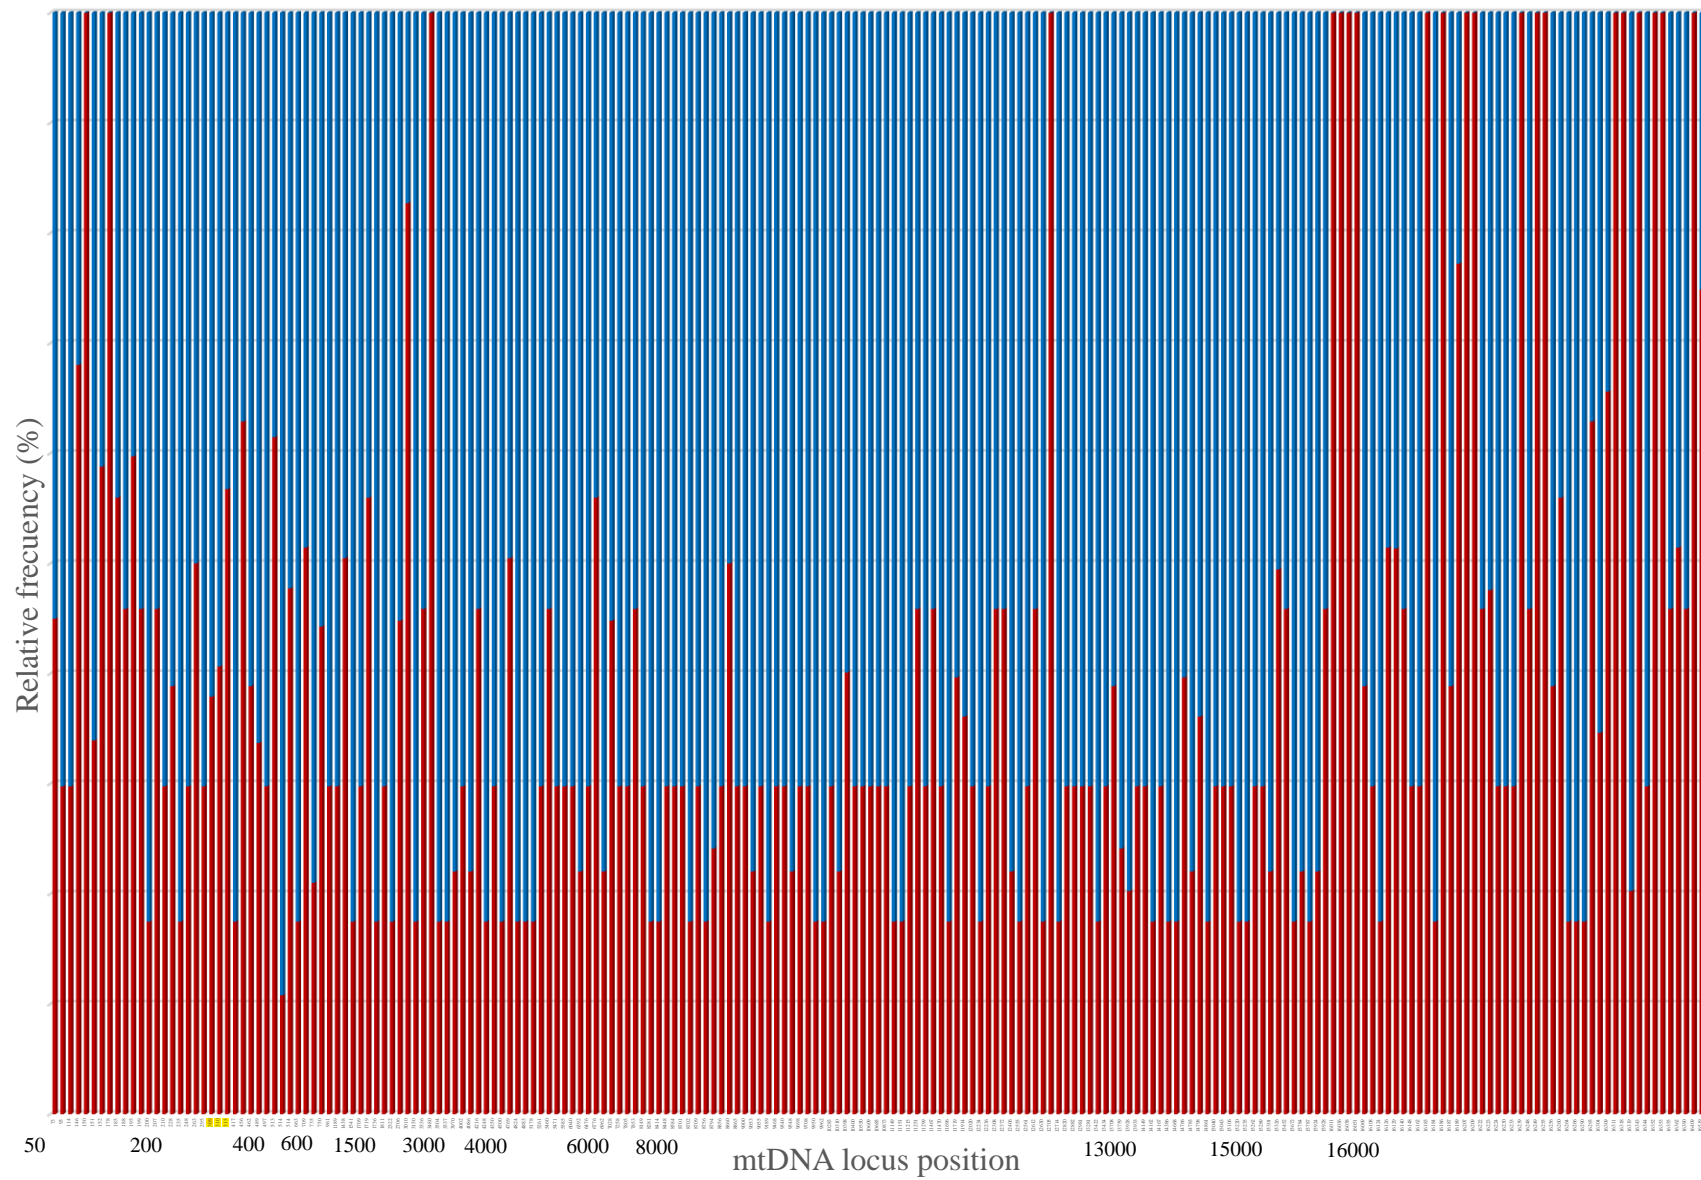

Supplement: Supplementary file 5 [file supplementary]

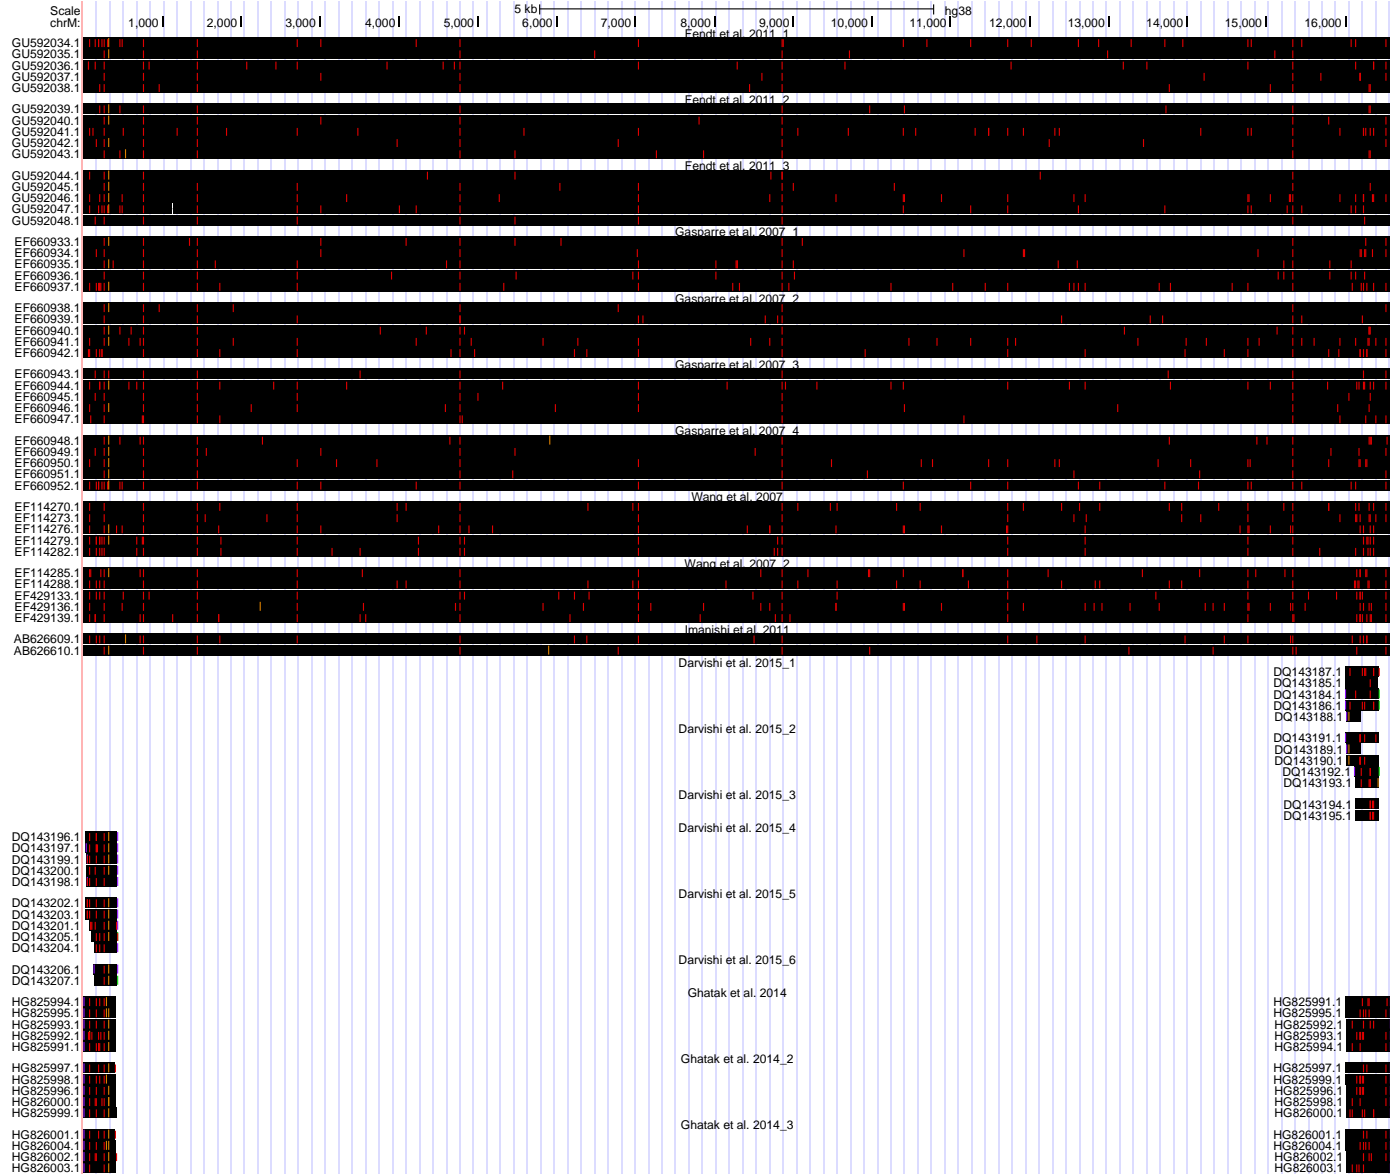

Supplement: Supplementary file 6 [file supplementary]
